# Supplementary material for: Clinical and molecular correlates of somatic and germline DDX41 variants in patients and families with myeloid neoplasms
Source: PubMed Central journal article supplement — Haematologica. 2023 May 18;108(11):3033–43. doi: 10.3324/haematol.2023.282867 (PMC10620593; doi:10.3324/haematol.2023.282867), 2023-05-18
Supplement: 2023_282867_BADAR_SUPPL.pdf [file 2023_282867_BADAR_SUPPL.pdf]

# Clinical and molecular correlates of somatic and germline *DDX41* variants in patients and families with myeloid neoplasms

Talha Badar,<sup>1</sup> Ahmad Nanaa,<sup>2,3</sup> James M. Foran,<sup>1</sup> David Viswanatha,<sup>4</sup> Aref Al-Kali,<sup>5</sup> Terra Lasho,<sup>5</sup> Christy Finke,<sup>5</sup> Hassan B. Alkhateeb,<sup>5</sup> Rong He,<sup>4</sup> Naseema Gangat,<sup>5</sup> Mithun Shah,<sup>5</sup> Ayalew Tefferi,<sup>5</sup> Abhishek A. Mangaonkar,<sup>5</sup> Mark R. Litzow,<sup>5</sup> Laura J. Ongie,<sup>6</sup> Timothy Chlon,<sup>7,8</sup> Alejandro Ferrer<sup>4</sup> and Mrinal M. Patnaik<sup>4</sup>

<sup>1</sup>Division of Hematology-Oncology and Bone Marrow Transplant Program, Mayo Clinic, Jacksonville, FL; <sup>2</sup>Division of Hematology, Mayo Clinic, Rochester, MN; <sup>3</sup>John H. Stroger, Jr. Hospital of Cook County, Chicago, IL; <sup>4</sup>Division of Hematopathology, Mayo Clinic, Rochester, MN; <sup>5</sup>Division of Hematology, Mayo Clinic, Rochester, MN; <sup>6</sup>Clinical Genomics, Mayo Clinic, Rochester, MN; <sup>7</sup>Division of Experimental Hematology and Cancer Biology, Cincinnati Children's Hospital Medical Center, Cincinnati, OH and <sup>8</sup>Department of Pediatrics, College of Medicine, University of Cincinnati, Cincinnati, OH, USA

**Correspondence:** T. Badar  
[badar.talha@mayo.edu](mailto:badar.talha@mayo.edu)

M. S. Patnaik  
[Patnaik.Mrinal@mayo.edu](mailto:Patnaik.Mrinal@mayo.edu)

**Received:** February 1, 2023.

**Accepted:** May 10, 2023.

**Early view:** May 18, 2023.

<https://doi.org/10.3324/haematol.2023.282867>

©2023 Ferrata Storti Foundation

Published under a CC BY-NC license

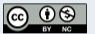

## **42 NGS panel at Mayo Clinic**

ANKRD26 (NM\_014915.2) 5'UTR, exons 1-4, intron c.172, ASXL1 (NM\_015338.5) exons 10-13, BCOR (NM\_001123385.1) exons 4-15, CALR (NM\_004343.3) exon 9, CBL (NM\_005188.3) intron 7 last 100bps before start of exon 8, exon 8, intron 8, and exon 9, CEBPA (NM\_004364.4) exon 1, CSF3R (NM\_000760.3) exons 14 and 17, DDX41 (NM\_016222.2) exons 1-17, DNMT3A (NM\_022552.4) exons 8-23, ELANE (NM\_001972.2) exons 1-5, ETNK1 (NM\_018638.4) exons 2-5, ETV6(NM\_001987.4) exons 3-8, EZH2 (NM\_004456.4) exons 2-20, FLT3 (NM\_004119.2) exons 14-20, GATA1 (NM\_002049.3) exons 2 and 4, GATA2 (NM\_001145661.1) exons 3-7, intron 5, c.1017+1 - 1017+730, IDH1 (NM\_005896.3) exon 4, IDH2(NM\_002168.3) exon 4, JAK2 (NM\_004972.3) exons 12-16, KDM6A (UTX)(NM\_021140.3) exons 1-29, KIT (NM\_000222.2) exons 8-11 and 17, KRAS(NM\_033360.3) exons 2-3, MPL (NM\_005373.2) exons 10-12, NPM1(NM\_002520.6) exons 9-11, to -30 before exon 11, NRAS (NM\_002524.4) exons 2 and 3, PHF6 (NM\_001015877.1) exons 2-10, PTPN11 (NM\_002834.3) exons 3-4 and 12-13, RAD21 (NM\_006265.2) exons 1, 2, 4-7, 9-11, 13, 14, exon 10 flank 15bp, RUNX1 (NM\_001001890.2) exons 1-6, intron 4 c.725-13T>A and intron 5 c.886+1-4del, SETBP1 (NM\_015559.2) partial exon 4; amino acids 400 - 950, SH2B3 (LNK)(NM\_005475.2) exon 2-8, SF3B1 (NM\_012433.2) exons 13-16, SRP72 (NM\_006947.3) exons 6, 10, SMC3 (NM\_005445.3) exons 7, 8, 13, 17, 19, 21, 29, SRSF2 (NM\_003016.4) exons 1 and 2, STAG2 (NM\_001042750.1) exons 4-34, 12, 17 and 22 flank 15bp, TERT (NM\_198253.2) exons 2-16, TET2(NM\_001127208.2) exons 3-11, TP53 (NM\_000546.4) exons 4-9, U2AF1(NM\_001025203.1) exons 2, 6, and 8, WT1 (NM\_024426.2) exons 1-10, and ZRSR2 (NM\_005089.3) exons 1-11.

| Supplementary Table 1. Demographic, baseline characteristics, genomic profile of patients with <i>DDX41</i> variant of unknown significance |                            |        |                          |                          |                          |                     |                 |                                      |                        |                                  |              |                      |
|---------------------------------------------------------------------------------------------------------------------------------------------|----------------------------|--------|--------------------------|--------------------------|--------------------------|---------------------|-----------------|--------------------------------------|------------------------|----------------------------------|--------------|----------------------|
| VUS Case No.                                                                                                                                | Diagnosis                  | Gender | Age at diagnosis (years) | Nucleotide variant (VUS) | Amino acid change (VUS)  | Mutation type (VUS) | DDX41 VUS VAF % | Germline status VUS                  | Pathogenic DDX41 (VAF) | Germline status Pathogenic DDX41 | Co mutations | Cytogenetics         |
| 76                                                                                                                                          | Anemia                     | F      | 63                       | c.1016G>A                | p.Arg339His              | Missense            | 47              | Presumed germline                    | No                     |                                  |              |                      |
| 103                                                                                                                                         | Cytopenia                  | M      | 72                       | c.1016G>A, c.1789A>G     | p.Arg339His, p.Lys597Glu | Missense, Missense  | 49, 22          | Confirmed germline, Presumed somatic | No                     |                                  |              | Diploid cytogenetics |
| 84                                                                                                                                          | IPSS Low risk MDS          | M      | 50                       | c.1018T>A                | p.Tyr340Asn              | Missense            | 50              | Presumed germline                    | No                     |                                  |              |                      |
| 91                                                                                                                                          | IPSS Intermediate risk MDS | F      | 39                       | c.1030G>T                | p.Asp344tyr              | Missense            | 49.5            | Presumed germline                    | No                     |                                  |              | Diploid cytogenetics |
| 85                                                                                                                                          | Thrombocytopenia           | M      | 78                       | c.1030G>T                | p.Asp344tyr              | Missense            | 49              | Presumed germline                    | No                     |                                  | DNMT3A       |                      |
| 29*                                                                                                                                         | IPSS very high risk MDS    | F      | 76                       | c.1032C>G                | p.Asp344Glu              | Missense            | 7               | Confirmed somatic                    | c.434+1G>A, (46%)      | Presumed germline                | ASXL1        | Diploid cytogenetics |
| 38*                                                                                                                                         | CCUS                       | F      | 72                       | c.1032C>G                | p.Asp344Glu              | Missense            | 21              | Confirmed somatic                    | c.1A>C, p.M1?, (22%)   | Confirmed somatic                |              | Diploid cytogenetics |
| 72                                                                                                                                          | AML                        | F      | 41                       | c.1238A>G                | p.Glu413Gly              | Missense            | 49              | Presumed germline                    | No                     |                                  |              |                      |
| 59                                                                                                                                          | AML                        | F      | 59                       | c.1283T>C                | p.Leu428Pro              | Missense            | 47              | Presumed germline                    | No                     |                                  | CEBPA        |                      |
| 46                                                                                                                                          | Polycythemia Vera          | M      | 72                       | c.138+5G>T               | p.?                      | Splice site         | 48              | Presumed germline                    | No                     |                                  |              | Diploid cytogenetics |
| 56                                                                                                                                          | AML                        | F      | 38                       | c.1436G>A                | p.Arg479Gln              | Missense            | 48              | Presumed germline                    | No                     |                                  | CEBPA        |                      |
| 62                                                                                                                                          | AML                        | F      | 37                       | c.1436G>A                | p.Arg479Gln              | Missense            | 48              | Presumed germline                    | No                     |                                  |              |                      |
| 66                                                                                                                                          | AML                        | F      | 83                       | c.1436G>A                | p.Arg479Gln              | Missense            | 46              | Presumed germline                    | No                     |                                  |              |                      |
| 2*                                                                                                                                          | AML                        | F      | 78                       | c.1558A>T                | p.Ile520Phe              | Missense            | 17              | Presumed somatic                     | c.3G>A, p.M1I, (48%)   | Confirmed germline               |              | Diploid cytogenetics |
| 81                                                                                                                                          | Thrombocytopenia           | M      | 46                       | c.1668G>T                | p.Lys556Asn              | Missense            | 49              | Presumed germline                    | No                     |                                  |              |                      |
| 45                                                                                                                                          | CHIP                       | M      | 40                       | c.1732+4A>G              | p.?                      | Splice site         | 49              | Presumed germline                    | No                     |                                  | JAK2         | Diploid cytogenetics |
| 99                                                                                                                                          | DDX41 carrier              | F      | 63                       | c.207A>C                 | p.Glu69Asp               | Missense            | 69              | Presumed germline                    | No                     |                                  |              | Inv 12               |
| 89                                                                                                                                          | Thrombocytopenia           | M      | 77                       | c.214G>A                 | p.Gly72Arg               | Missense            | 50              | Presumed germline                    | No                     |                                  | TET2         |                      |
| 100                                                                                                                                         | Thrombocytopenia           | F      | 67                       | c.28-3C>T                | p.?                      | Splice site         | 49              | Confirmed germline                   | No                     |                                  |              |                      |
| 49                                                                                                                                          | CCUS                       | M      | 74                       | c.465G>A                 | p.Met155Ile              | Missense            | 49              | Presumed germline                    | No                     |                                  |              | Diploid cytogenetics |
| 60                                                                                                                                          | Pancytopenia               | M      | 23                       | c.465G>A                 | p.Met155Ile              | Missense            | 48              | Presumed germline                    | No                     |                                  |              |                      |
| 64                                                                                                                                          | AML                        | M      | 46                       | c.465G>A                 | p.Met155Ile              | Missense            | 47              | Presumed germline                    | No                     |                                  |              |                      |

| Supplementary Table 1. Demographic, baseline characteristics, genomic profile of patients with <i>DDX41</i> variant of unknown significance |                                  |        |                          |                          |                         |                     |                 |                     |                               |                                  |                           |                      |
|---------------------------------------------------------------------------------------------------------------------------------------------|----------------------------------|--------|--------------------------|--------------------------|-------------------------|---------------------|-----------------|---------------------|-------------------------------|----------------------------------|---------------------------|----------------------|
| VUS Case No.                                                                                                                                | Diagnosis                        | Gender | Age at diagnosis (years) | Nucleotide variant (VUS) | Amino acid change (VUS) | Mutation type (VUS) | DDX41 VUS VAF % | Germline status VUS | Pathogenic DDX41 (VAF)        | Germline status Pathogenic DDX41 | Co mutations              | Cytogenetics         |
| 70                                                                                                                                          | Essential thrombocytosis         | F      | 69                       | c.465G>A                 | p.Met155Ile             | Missense            | 48              | Presumed germline   | No                            |                                  |                           |                      |
| 69                                                                                                                                          | Pancytopenia                     | F      | 39                       | c.465G>A                 | p.Met155Ile             | Missense            | 48              | Presumed germline   | No                            |                                  |                           |                      |
| 86                                                                                                                                          | Cytopenia                        | M      | 30                       | c.502C>T                 | p.His168Tyr             | Missense            | 49              | Presumed germline   | No                            |                                  |                           |                      |
| 71                                                                                                                                          | AML                              | F      | 30                       | c.505A>G                 | p.Ile169Val             | Missense            | 49              | Presumed germline   | No                            |                                  |                           |                      |
| 104                                                                                                                                         | Leukopenia                       | M      | 79                       | c.511G>C                 | p.Val171Leu             | Missense            | 48              | Confirmed germline  | No                            |                                  |                           | Diploid cytogenetics |
| 5*                                                                                                                                          | IPSS High risk MDS               | F      | 81                       | c.517G>A                 | p.Gly173Arg             | Missense            | 50              | Presumed germline   | c.1574G>A, p.Arg525His, (7%)  | Presumed somatic                 |                           | Diploid cytogenetics |
| 30*                                                                                                                                         | CCUS                             | M      | 72                       | c.517G>A                 | p.Gly173Arg             | Missense            | 46              | Presumed germline   | c.1574G>A, p.Arg525His, (5%)  | Presumed somatic                 | DNMT3A                    | Trisomy 8            |
| 63                                                                                                                                          | MDS <sup>a</sup>                 | F      | 75                       | c.517G>A                 | p.Gly173Arg             | Missense            | 47              | Presumed germline   | No                            |                                  | SMC3                      |                      |
| 68                                                                                                                                          | MDS <sup>a</sup>                 | F      | 40                       | c.517G>A                 | p.Gly173Arg             | Missense            | 48              | Presumed germline   | No                            |                                  |                           |                      |
| 82                                                                                                                                          | MDS <sup>a</sup>                 | M      | 58                       | c.517G>A                 | p.Gly173Arg             | Missense            | 48              | Presumed germline   | No                            |                                  |                           |                      |
| 87                                                                                                                                          | Pancytopenia                     | M      | 73                       | c.517G>A                 | p.Gly173Arg             | Missense            | 51              | Presumed germline   | No                            |                                  |                           |                      |
| 75                                                                                                                                          | AML                              | M      | 59                       | c.527T>C                 | p.Ile176Thr             | Missense            | 91              | Presumed germline   | No                            |                                  |                           |                      |
| 61                                                                                                                                          | AML                              | F      | 53                       | c.538A>G                 | p.Ile180Val             | Missense            | 50              | Presumed germline   | No                            |                                  |                           |                      |
| 92                                                                                                                                          | IPSS Intermediate risk (MDS-EB1) | M      | 65                       | c.547T>G                 | p.Phe183Val             | Missense            | 45              | Presumed germline   | No                            |                                  |                           | Diploid cytogenetics |
| 50                                                                                                                                          | Low risk MDS                     | M      | 67                       | c.566C>T                 | p.Pro189Leu             | Missense            | 48              | Presumed germline   | No                            |                                  |                           | Diploid cytogenetics |
| 34*                                                                                                                                         | MDS <sup>a</sup>                 | F      | 88                       | c.571G>A                 | p.Ala191Thr             | Missense            | 46              | Confirmed germline  | c.1574G>A, p.Arg525His, (5%)  | Presumed somatic                 |                           | Diploid cytogenetics |
| 47                                                                                                                                          | IPSS High risk MDS (MDS-EB1)     | F      | 61                       | c.571G>A                 | p.Ala191Thr             | Missense            | 48              | Presumed germline   | No                            |                                  |                           | Diploid cytogenetics |
| 28*                                                                                                                                         | MDS <sup>a</sup>                 | M      | 73                       | c.610C>T                 | p.Pro204Ser             | Missense            | 40              | Presumed germline   | c.1589G>A, p.Gly530Asp, (46%) | Presumed germline                | JAK2                      | Diploid cytogenetics |
| 52                                                                                                                                          | IPSS Intermediate risk MDS       | M      | 61                       | c.616C>G                 | p.Pro206Ala             | Missense            | 14              | Presumed somatic    | No                            |                                  | DNMT3A, SRSF2, TET2, FLT3 | Complex cytogenetics |
| 90                                                                                                                                          | Pancytopenia                     | M      | 73                       | c.616C>G                 | p.Pro206Ala             | Missense            | 48              | Presumed germline   | No                            |                                  |                           |                      |
| 19*                                                                                                                                         | IPSS Very high risk              | M      | 64                       | c.622C>G                 | p.Gln208Glu             | Missense            | 11              | Confirmed           | c.1574G>A,                    | Confirmed                        |                           | Diploid cytogenetics |

| Supplementary Table 1. Demographic, baseline characteristics, genomic profile of patients with <i>DDX41</i> variant of unknown significance |                                  |        |                          |                          |                         |                     |                 |                     |                               |                                  |              |                                         |
|---------------------------------------------------------------------------------------------------------------------------------------------|----------------------------------|--------|--------------------------|--------------------------|-------------------------|---------------------|-----------------|---------------------|-------------------------------|----------------------------------|--------------|-----------------------------------------|
| VUS Case No.                                                                                                                                | Diagnosis                        | Gender | Age at diagnosis (years) | Nucleotide variant (VUS) | Amino acid change (VUS) | Mutation type (VUS) | DDX41 VUS VAF % | Germline status VUS | Pathogenic DDX41 (VAF)        | Germline status Pathogenic DDX41 | Co mutations | Cytogenetics                            |
|                                                                                                                                             | MDS                              |        |                          |                          |                         |                     |                 | somatic             | p.Arg525His, (9%)             | somatic                          |              |                                         |
| 80                                                                                                                                          | MDS <sup>a</sup>                 | M      | 81                       | c.649T>C                 | p.Ser217Pro             | Missense            | 49              | Presumed germline   | No                            |                                  | DNMT3A       |                                         |
| 83                                                                                                                                          | MDS <sup>a</sup>                 | M      | 67                       | c.653G>A                 | p.Gly218Asp             | Missense            | 49              | Presumed germline   | No                            |                                  |              |                                         |
| 53                                                                                                                                          | IPSS Intermediate risk (MDS-EB2) | M      | 63                       | c.653G>A                 | p.Gly218Asp             | Missense            | 50              | Presumed germline   | No                            |                                  |              | Diploid cytogenetics                    |
| 58                                                                                                                                          | Anemia                           | M      | 40                       | c.656G>A                 | p.Arg219His             | Missense            | 49              | Presumed germline   | No                            |                                  | SH2B3        |                                         |
| 57                                                                                                                                          | AML                              | M      | 54                       | c.656G>A                 | p. Arg219His            | Missense            | 49              | Presumed germline   | No                            |                                  | EZH2         |                                         |
| 102                                                                                                                                         | CCUS                             | F      | 77                       | c.680C>T                 | p.Thr227Met             | Missense            | 48              | Presumed germline   | No                            |                                  | CBL          | Diploid cytogenetics                    |
| 94                                                                                                                                          | CCUS                             | F      | 40                       | c.6G>T                   | p.Glu2Asp               | Missense            | 49              | Presumed germline   | No                            |                                  |              | Ins (9;?) (p13.8), del20 (q11.2, q13.3) |
| 14*                                                                                                                                         | MDS <sup>a</sup>                 | M      | 53                       | c.710T>G                 | p.Leu237Trp             | Missense            | 46              | Confirmed germline  |                               |                                  |              | Diploid cytogenetics                    |
| 78                                                                                                                                          | Anemia                           | F      | 80                       | c.728G>A                 | p.Cys243Tyr             | Missense            | 47              | Presumed germline   | No                            |                                  |              |                                         |
| 95                                                                                                                                          | IPSS Intermediate risk (MDS-EB1) | M      | 67                       | c.740A>G                 | p.Glu247Gly             | Missense            | 46              | Presumed germline   | No                            |                                  |              | Diploid cytogenetics                    |
| 98                                                                                                                                          | DDX41 carrier                    | F      | 45                       | c.740A>G                 | p.Glu247Gly             | Missense            | 45              | Confirmed germline  | No                            |                                  |              | Diploid cytogenetics                    |
| 74                                                                                                                                          | MDS <sup>a</sup>                 | F      | 38                       | c.766G>A                 | p.Glu256Lys             | Missense            | 50              | Presumed germline   | No                            |                                  |              |                                         |
| 3*                                                                                                                                          | AML                              | M      | 59                       | c.773C>T                 | p.Pro258Leu             | Missense            | 46              | Confirmed germline  | c.1574G>A, p.Arg525His, (11%) | Presumed somatic                 |              | Diploid cytogenetics                    |
| 33*                                                                                                                                         | MDS <sup>a</sup>                 | M      | 68                       | c.773C>T                 | p.Pro258Leu             | Missense            | 46              | Presumed germline   | c.1588G>A, p.Gly530Ser, (6%)  | Presumed somatic                 |              | Diploid cytogenetics                    |
| 65                                                                                                                                          | AML                              | M      | 75                       | c.773C>T                 | p.Pro258Leu             | Missense            | 47              | Presumed germline   | No                            |                                  |              |                                         |
| 67                                                                                                                                          | MDS <sup>a</sup>                 | M      | 61                       | c.773C>T                 | p.Pro258Leu             | Missense            | 47              | Presumed germline   | No                            |                                  |              |                                         |
| 93                                                                                                                                          | IPSS High risk (MDS-EB2)         | M      | 69                       | c.773C>T                 | p.Pro258Leu             | Missense            | 50              | Presumed germline   | No                            |                                  |              | Diploid cytogenetics                    |
| 96                                                                                                                                          | DDX41 carrier                    | F      | 36                       | c.773C>T                 | p.Pro258Leu             | Missense            | 45              | Presumed germline   | No                            |                                  |              | Diploid cytogenetics                    |
| 97                                                                                                                                          | AML                              | M      | 27                       | c.773C>T                 | p.Pro258Leu             | Missense            | 45              | Confirmed germline  | No                            |                                  |              |                                         |
| 79                                                                                                                                          | Cytopenia                        | F      | 71                       | c.811C>T                 | p.Arg271Trp             | Missense            | 48              | Presumed germline   | No                            |                                  |              |                                         |
| 51                                                                                                                                          | IPSS Low risk MDS                | F      | 62                       | c.866C>T                 | p.Ser289Leu             | Missense            | 52              | Presumed germline   | No                            |                                  |              | Diploid cytogenetics                    |

| Supplementary Table 1. Demographic, baseline characteristics, genomic profile of patients with <i>DDX41</i> variant of unknown significance |                              |        |                          |                          |                          |                     |                 |                                     |                               |                                  |              |                      |
|---------------------------------------------------------------------------------------------------------------------------------------------|------------------------------|--------|--------------------------|--------------------------|--------------------------|---------------------|-----------------|-------------------------------------|-------------------------------|----------------------------------|--------------|----------------------|
| VUS Case No.                                                                                                                                | Diagnosis                    | Gender | Age at diagnosis (years) | Nucleotide variant (VUS) | Amino acid change (VUS)  | Mutation type (VUS) | DDX41 VUS VAF % | Germline status VUS                 | Pathogenic DDX41 (VAF)        | Germline status Pathogenic DDX41 | Co mutations | Cytogenetics         |
| 54                                                                                                                                          | Cytopenia                    | F      | 54                       | c.907G>A                 | p.Val303Met              | Missense            | 48              | Presumed germline                   | No                            |                                  |              | Diploid cytogenetics |
| 77                                                                                                                                          | AML                          | F      | 76                       | c.907G>A                 | p.Val303Met              | Missense            | 47              | Presumed germline                   | No                            |                                  |              |                      |
| 23*                                                                                                                                         | AML                          | M      | 56                       | c.959C>T                 | p.Thr320Ile              | Missense            | 49              | Confirmed germline                  | c.1589G>A, p.Gly530Asp, (28%) | Confirmed somatic                | ASXL1        | Diploid cytogenetics |
| 106                                                                                                                                         | IPSS Very Low risk MDS       | F      | 39                       | c.962 C>T, c.1030G>T     | p.Pro321Leu, p.Asp344Tyr | Missense, Missense  | 19, 50          | Presumed somatic, Presumed germline | No                            |                                  |              | Diploid cytogenetics |
| 88                                                                                                                                          | Thrombocytopenia             | M      | 62                       | c.97T>C                  | p.Tyr33His               | Missense            | 50              | Presumed germline                   | No                            |                                  |              |                      |
| 73                                                                                                                                          | AML                          | F      | 70                       | c.97T>C                  | p.Tyr33His               | Missense            | 48              | Presumed germline                   | No                            |                                  | CSF3R        |                      |
| 48                                                                                                                                          | IPSS high risk MDS (MDS-EB1) | M      | 81                       | c.992_994del             | p.Lys331del              | Missense            | 44              | Presumed germline                   | No                            |                                  |              | -Y                   |
| 55                                                                                                                                          | Aplastic anemia              | M      | 52                       | c.992_994del             | p.Lys331del              | Deletion            | 43              | Presumed germline                   | No                            |                                  |              | Diploid cytogenetics |
| 101                                                                                                                                         | Pancytopenia                 | M      | 82                       | c.992_994del             | p.Lys331del              | Deletion            | 41              | Confirmed germline                  | No                            |                                  |              | Diploid cytogenetics |

\**DDX41* variants previously reported by our group (Alkhateeb, H. B. *et al. Blood adv* [2021])  
<sup>a</sup> MDS prognostication data missing.  
CCUS; clonal cytopenia of undetermined significance, IPSS; international prognostic scoring system, N/A; not available.

| Supplementary Table 2: In silico prediction of pathogenicity of <i>DDX41</i> variants of unknown significance |                           |                          |            |             |                           |            |               |                                      |                                              |                             |                                              |               |
|---------------------------------------------------------------------------------------------------------------|---------------------------|--------------------------|------------|-------------|---------------------------|------------|---------------|--------------------------------------|----------------------------------------------|-----------------------------|----------------------------------------------|---------------|
| Genomic change (Chr38)                                                                                        | cDNA change (NM_016222.4) | Predicted protein impact | CADD score | REVEL score | gnomAD (% All population) | # Patients | ClinVar entry | ClinVar classification               | ACMG criteria                                | Current ACMG classification | Previous references                          | Novel variant |
| Chr5:177513767C>T                                                                                             | c.1016G>A                 | p.Arg339His              | 28.8       | 0.395       | 0.0032%                   | 2          | 434921        | Conflicting - Likely Pathogenic, VUS | PM2_Supporting, PM5                          | VUS                         | PMID: 31713024, 32307695                     | No            |
| Chr5:177512609C>T                                                                                             | c.1436G>A                 | p.Arg479Gln              | 24.3       | 0.416       | 0.0067%                   | 3          | 978208        | VUS                                  | PM2_Supporting                               | VUS                         | N/A                                          | No            |
| Chr5:177516838G>A                                                                                             | c.28-3C>T                 | p.?                      | 16.75      | 0           | Not described             | 1          | Not described | N/A                                  | PM2_Supporting, BP4_Supporting               | VUS                         | N/A                                          | Yes           |
| Chr5:177515791C>T                                                                                             | c.465G>A                  | p.Met155Ile              | 22.6       | 0.669       | 0.023%                    | 5          | 1254618       | VUS                                  | PS4_Moderate, PM2_Supporting, PP3_Supporting | VUS                         | PMID: 25920683, 31911633                     | No            |
| Chr5:177515745C>G                                                                                             | c.511G>C                  | p.Val171Leu              | 23.9       | 0.153       | 0.002%                    | 1          | 1336347       | VUS                                  | PM2_Supporting, BP4_Moderate                 | VUS                         | PMID: 33332384                               | No            |
| Chr5:177515058C>T                                                                                             | c.656G>A                  | p.Arg219His              | 31         | 0.488       | 0.0032%                   | 2          | Not described | N/A                                  | PM2_Supporting                               | VUS                         | N/A                                          | No            |
| Chr5:177514974T>C                                                                                             | c.740A>G                  | p.Glu247Gly              | 29.3       | 0.352       | 0.0004%                   | 2          | 1333084       | Likely Pathogenic                    | PM2_Supporting, PM5                          | VUS                         | N/A                                          | No            |
| Chr5:177514941G>A                                                                                             | c.773C>T                  | p.Pro258Leu              | 25.8       | 0.641       | 0.0004%                   | 6          | 1338483       | Likely Pathogenic                    | PS4_Moderate, PM2_Supporting, PP3_Supporting | VUS                         | PMID: 33850299, 32307695, 31256854, 35987913 | No            |
| Chr5:177513789_177513791del                                                                                   | c.992_994del              | p.Lys331del              | N/A        | N/A         | 0.0014%                   | 3          | Not described | N/A                                  | PS4_Moderate, PM2_Supporting, PM4            | VUS                         | PMID: 35671390                               | No            |
| Chr5:177515739C>T                                                                                             | c.517G>A                  | p.Gly173Arg              | 29.2       | 0.454       | 0.0032%                   | 6          | 978206        | Likely Pathogenic                    | PS4_Moderate, PM2_Supporting                 | VUS                         | PMID: 35987913                               | No            |
| Chr5:177513765A>T                                                                                             | c.1018T>A                 | p.Tyr340Asn              | 23.6       | 0.648       | Not described             | 2          | Not described | N/A                                  | PM2_Supporting, PP3_Supporting               | VUS                         | N/A                                          | Yes           |
| Chr5:177513753C>A                                                                                             | c.1030G>T                 | p.Asp344Tyr              | 29.9       | 0.967       | Not described             | 3          | Not described | N/A                                  | PM2_Supporting, PP3_Strong                   | VUS                         | N/A                                          | Yes           |
| Chr5:177513751G>C                                                                                             | c.1032C>G                 | p.Asp344Glu              | 18.15      | 0.903       | Not described             | 2          | Not described | N/A                                  | PM2_Supporting, PS3_moderate                 | VUS                         | N/A                                          | Yes           |
| Chr5:177513075T>C                                                                                             | c.1238A>G                 | p.Glu413Gly              | 30         | 0.901       | 0.002%                    | 1          | Not described | N/A                                  | PM2_Supporting, PP3_Supporting               | VUS                         | PMID: 30963592                               | No            |
| Chr5:177513030A>G                                                                                             | c.1283T>C                 | p.Leu428Pro              | 32         | 0.961       | Not described             | 1          | 1336572       | VUS                                  | PM2_Supporting, PP3_Strong                   | VUS                         | N/A                                          | No            |
| Chr5:177512385T>A                                                                                             | c.1558A>T                 | p.Ile520Phe              | 26.8       | 0.590       | Not described             | 1          | Not described | N/A                                  | PM2_Supporting                               | VUS                         | N/A                                          | Yes           |
| Chr5:177512160C>A                                                                                             | c.1668G>T                 | p.Lys556Asn              | 21.9       | 0.3         | 0.008%                    | 1          | 977491        | VUS                                  | PM2_Supporting                               | VUS                         | N/A                                          | No            |
| Chr5:177512092T>C                                                                                             | c.1732+4A>G               | p.?                      | 8.666      | N/A         | 0.0008%                   | 1          | Not described | N/A                                  | PM2_Supporting                               | VUS                         | N/A                                          | No            |
| Chr5:177516379T>G                                                                                             | c.207A>C                  | p.Glu69Asp               | 10.86      | 0.082       | Not described             | 1          | Not described | N/A                                  | PM2_Supporting, BP4_Moderate                 | VUS                         | N/A                                          | Yes           |
| Chr5:177516372C>T                                                                                             | c.214G>A                  | p.Gly72Arg               | 36         | 0           | Not described             | 1          | Not described | N/A                                  | PM2_Supporting, BP4_Very Strong              | VUS                         | N/A                                          | Yes           |
| Chr5:177515754G>A                                                                                             | c.502C>T                  | p.His168Tyr              | 22.9       | 0.116       | 0.0004%                   | 1          | Not described | N/A                                  | PM2_Supporting, BP4_Moderate                 | VUS                         | N/A                                          | No            |
| Chr5:177515751T>C                                                                                             | c.505A>G                  | p.Ile169Val              | 25.1       | 0.245       | Not described             | 1          | Not described | N/A                                  | PM2_Supporting, BP4_Supporting               | VUS                         | N/A                                          | Yes           |
| Chr5:177515745C>G                                                                                             | c.511G>C                  | p.Val171Leu              | 23.9       | 0.153       | 0.002%                    | 1          | 1336347       | VUS                                  | PM2_Supporting, BP4_Moderate                 | VUS                         | PMID:33929502                                | No            |
| Chr5:177515729A>G                                                                                             | c.527T>C                  | p.Ile176Thr              | 24.4       | 0.214       | 0.0004%                   | 1          | Not described | N/A                                  | PM2_Supporting, BP4_Supporting               | VUS                         | N/A                                          | No            |
| Chr5:177515718T>C                                                                                             | c.538A>G                  | p.Ile180Val              | 23.3       | 0.063       | 0.0065%                   | 1          | Not described | N/A                                  | PM2_Supporting, BP4_Moderate                 | VUS                         | N/A                                          | No            |
| Chr5:177515709A>C                                                                                             | c.547T>G                  | p. Phe183Val             | 29         | 0.675       | Not described             | 1          | Not described | N/A                                  | PM2_Supporting, PP3_Supporting               | VUS                         | PMID: 3358199                                | No            |

| Supplementary Table 2: In silico prediction of pathogenicity of <i>DDX41</i> variants of unknown significance |                           |                          |            |             |                           |            |               |                                      |                                |                             |                                                                            |               |
|---------------------------------------------------------------------------------------------------------------|---------------------------|--------------------------|------------|-------------|---------------------------|------------|---------------|--------------------------------------|--------------------------------|-----------------------------|----------------------------------------------------------------------------|---------------|
| Genomic change (Chr38)                                                                                        | cDNA change (NM_016222.4) | Predicted protein impact | CADD score | REVEL score | gnomAD (% All population) | # Patients | ClinVar entry | ClinVar classification               | ACMG criteria                  | Current ACMG classification | Previous references                                                        | Novel variant |
| Chr5:177515690G>A                                                                                             | c.566C>T                  | p.Pro189Leu              | 27.3       | 0.285       | 0.00071                   | 1          | 1336295       | VUS                                  | PM2_Supporting, BP4_Supporting | VUS                         | PMID: 35671390                                                             | No            |
| Chr5:177515685C>T                                                                                             | c.571G>A                  | p.Ala191Thr              | 34         | 0.069       | Not described             | 2          | 1330726       | Conflicting – Likely Pathogenic, VUS | PM2_Supporting, BP4_Moderate   | VUS                         | N/A                                                                        | No            |
| Chr5:177515220G>A                                                                                             | c.610C>T                  | p.Pro204Ser              | 27.1       | 0.673       | Not described             | 1          | Not described | N/A                                  | PM2_Supporting, PP3_Supporting | VUS                         | PMID: 35987913                                                             | No            |
| Chr5:177515214G>C                                                                                             | c.616C>G                  | p.Pro206Ala              | 25.7       | 0.276       | 0.0048%                   | 2          | Not described | N/A                                  | PM2_Supporting, BP4_Supporting | VUS                         | N/A                                                                        | No            |
| Chr5:177515208G>C                                                                                             | c.622C>G                  | p.Gln208Glu              | 26         | 0.918       | 0.0004%                   | 1          | Not described | N/A                                  | PM2_Supporting, PP3_Moderate   | VUS                         | PMID: 35987913                                                             | No            |
| Chr5:177515065A>G                                                                                             | c.649T>C                  | p.Ser217Pro              | 24.4       | 0.235       | 0.0008%                   | 1          | 1188500       | Likely Pathogenic                    | PM2_Supporting, BP4_Supporting | VUS                         | PMID: 30963592                                                             | No            |
| Chr5:177515061C>T                                                                                             | c.653G>A                  | p.Gly218Asp              | 27         | 0.531       | 0.0018%                   | 2          | 1217660       | Conflicting – Likely Pathogenic, VUS | PM2_Supporting                 | VUS                         | PMID: 31911633                                                             | No            |
| Chr5:177515034G>A                                                                                             | c.680C>T                  | p.Thr227Met              | 29.4       | 0.835       | Not described             | 1          | Not described | N/A                                  | PM2_Supporting, PP3_Moderate   | VUS                         | PMID: 33626862, 32307695                                                   | No            |
| Chr5:177516940C>A                                                                                             | c.6G>T                    | p.Glu2Asp                | 22.9       | 0.076       | 0.0079%                   | 1          | 1275746       | VUS                                  | PM2_Supporting, BP4_Moderate   | VUS                         | PMID: 32890400                                                             | No            |
| Chr5:177515004A>C                                                                                             | c.710T>G                  | p.Leu237Trp              | 27.7       | 0.486       | Not described             | 1          | Not described | N/A                                  | PM2_Supporting                 | VUS                         | N/A                                                                        | Yes           |
| Chr5:177514986C>T                                                                                             | c.728G>A                  | p.Cys243Tyr              | 25.9       | 0.261       | Not described             | 1          | Not described | N/A                                  | PM2_Supporting, BP4_Supporting | VUS                         | N/A                                                                        | Yes           |
| Chr5:177514948C>T                                                                                             | c.766G>A                  | p.Glu256Lys              | 24.8       | 0.415       | 0.0016%                   | 1          | 1338053       | VUS                                  | PM2_Supporting                 | VUS                         | N/A                                                                        | No            |
| Chr5:177514825G>A                                                                                             | c.811C>T                  | p.Arg271Trp              | 31         | 0.299       | 0.0008%                   | 1          | Not described | N/A                                  | PM2_Supporting                 | VUS                         | N/A                                                                        | No            |
| Chr5:177514770G>A                                                                                             | c.866C>T                  | p.Ser289Leu              | 23.1       | 0.08        | Not described             | 1          | Not described | N/A                                  | PM2_Supporting, BP4_Strong     | VUS                         | N/A                                                                        | Yes           |
| Chr5:177514729C>T                                                                                             | c.907G>A                  | p.Val303Met              | 20.6       | 0.184       | 0.0093%                   | 2          | Not described | N/A                                  | PM2_Supporting, BP4_Supporting | VUS                         | N/A                                                                        | No            |
| Chr5:177513824G>A                                                                                             | c.959C>T                  | p.Thr320Ile              | 27.9       | 0.772       | Not described             | 1          | 1338592       | VUS                                  | PM2_Supporting, PP3_Supporting | VUS                         | N/A                                                                        | No            |
| Chr5:177513821G>A                                                                                             | c.962 C>T                 | P.Pro321Leu              | 29.8       | 0.682       | Not described             | 1          | Not described | N/A                                  | PM2_Supporting, PP3_Supporting | VUS                         | PMID: 30144193, 33332384, 30963592, 34918362, 25920683, 32307695, 32508881 | No            |
| Chr5:177516766A>G                                                                                             | c.97T>C                   | p.Tyr33His               | 25.1       | 0.144       | 0.0068%                   | 2          | 1338019       | VUS                                  | PM2_Supporting, BP4_Moderate   | VUS                         | N/A                                                                        | No            |

CADD: combined annotation dependent depletion, REVEL: rare exome variant ensemble learner, VUS: variant of unknown significance, #; number



| <b>Supplementary Table 3. Clinical characteristics and outcome of patients with concurrent somatic mutations (N=31)</b>                                                                                                                   |                                 |                         |                |
|-------------------------------------------------------------------------------------------------------------------------------------------------------------------------------------------------------------------------------------------|---------------------------------|-------------------------|----------------|
| <b>Variables</b>                                                                                                                                                                                                                          | <b>DDX41 pathogenic (N= 15)</b> | <b>DDX41 VUS (N=16)</b> | <b>P value</b> |
| <b>Age years, median(range)- at diagnosis</b>                                                                                                                                                                                             | 68 (50-76)                      | 68 (38-81)              | >0.99          |
| <b>Gender (male), n (%)</b>                                                                                                                                                                                                               | 9 (60)                          | 9 (56)                  | >0.99          |
| <b>Hemoglobin G/dL, median (range)</b>                                                                                                                                                                                                    | 9.6 (7-22.1)                    | 12.8 (9.6-17.6)         | 0.36           |
| <b>WBC x 10<sup>9</sup>/L, median (range)</b>                                                                                                                                                                                             | 2.5 (1.6-21)                    | 3.6 (2.3-18.8)          | 0.36           |
| <b>Platelet x 10<sup>9</sup>/L, median (range)</b>                                                                                                                                                                                        | 91 (26-440)                     | 231 (72-571)            | 0.06           |
| <b>BM blasts %, median (range)</b>                                                                                                                                                                                                        | 12 (0-30)                       | 1 (0-8.0)               | 0.14           |
| <b>Myeloid disease classification</b>                                                                                                                                                                                                     |                                 |                         |                |
| MDS                                                                                                                                                                                                                                       | 5 (33)                          | 10 (66)                 | 0.06           |
| AML                                                                                                                                                                                                                                       | 3 (20)                          | 3 (19)                  | >0.99          |
| MPN                                                                                                                                                                                                                                       | 1 (7)                           | 1 (7)                   | >0.99          |
| CCUS                                                                                                                                                                                                                                      | 1 (7)                           | 2 (12.5)                | >0.99          |
| <b>DDX41 VAF (%), median (range)</b>                                                                                                                                                                                                      | 46 (5-51)                       | 48 (15-52)              | 0.27           |
| <b>Abnormal cytogenetics</b>                                                                                                                                                                                                              | 6 (40)                          | 2 (12.5)                | >0.99          |
| <b>Progression to AML</b>                                                                                                                                                                                                                 | 2 (14)                          | 2 (12.5)                | 0.31           |
| <b>Requiring treatment</b>                                                                                                                                                                                                                | 13 (87)                         | 3 (19)                  | 0.08           |
| <b>Time on observation, median in months</b>                                                                                                                                                                                              | 28.7 (11.2-33.9)                | 19.1 (17.1-27.6)        | >0.90          |
| <b>Time to treatment, median in months</b>                                                                                                                                                                                                | 0.60 (0.30-83.6)                | 2.17 (1.67-12.13)       | 0.20           |
| <b>Overall survival, median in months</b>                                                                                                                                                                                                 | 61.6                            | 55.73                   | 0.69           |
| N; number, WBC; white blood cell count, BM; bone marrow, MDS; myelodysplastic syndrome, AML; acute myeloid leukemia, MPN; myeloproliferative neoplasm, CCUS; clonal cytopenia of undetermined significance, VAF; variant allele frequency |                                 |                         |                |

## References

1. Polprasert, C., et al., *Novel DDX41 variants in Thai patients with myeloid neoplasms*. Int J Hematol, 2020. **111**(2): p. 241-246.
2. Qu, S., et al., *Molecular and clinical features of myeloid neoplasms with somatic DDX41 mutations*. Br J Haematol, 2021. **192**(6): p. 1006-1010.
3. Polprasert, C., et al., *Inherited and Somatic Defects in DDX41 in Myeloid Neoplasms*. Cancer Cell, 2015. **27**(5): p. 658-70.
4. Li, S.T., et al., *Rare germline variant contributions to myeloid malignancy susceptibility*. Leukemia, 2020. **34**(6): p. 1675-1678.
5. Byrjalsen, A., et al., *Nationwide germline whole genome sequencing of 198 consecutive pediatric cancer patients reveals a high incidence of cancer prone syndromes*. PLoS Genet, 2020. **16**(12): p. e1009231.
6. Singhal, D., et al., *Targeted gene panels identify a high frequency of pathogenic germline variants in patients diagnosed with a hematological malignancy and at least one other independent cancer*. Leukemia, 2021. **35**(11): p. 3245-3256.
7. Mangaonkar, A.A., et al., *Clinical Applications and Utility of a Precision Medicine Approach for Patients With Unexplained Cytopenias*. Mayo Clin Proc, 2019. **94**(9): p. 1753-1768.
8. Baranwal, A., et al., *Outcomes of allogeneic transplant in patients with DDX41 mutated myelodysplastic syndrome and acute myeloid leukemia*. Bone Marrow Transplant, 2022: p. 1-3.
